# Supplementary material for: Constructing Gas Transmission Pathways in Two-Dimensional Composite Material ZIF-8@BNNS Mixed-Matrix Membranes to Enhance CO2/N2 Separation Performance
Source: MDPI journal article supplement (doi:10.3390/membranes13040444), 2023-04-19
Supplement: s1 [file s1]

## **Supporting Information**

**Constructing gas transmission pathways of two-dimensional  
composite material ZIF-8@BNNS mixed matrix membranes  
to enhance CO<sub>2</sub>/N<sub>2</sub> separation performance**

## Legend of Figures

**Figure S1.** SEM image and EDS mapping (Zn and B) of ZIF-8@BNNS.

**Figure S2.** SEM surface image of the ZIF-8@BNNS/Pebax membrane loaded with

(a) 5 wt% (b) 10 wt% (c) 15 wt%

**Figure S3.** SEM cross-section image of the ZIF-8@BNNS/Pebax membrane loaded

with (a) 5 wt% (b) 10 wt% (c) 15 wt% (d) 20 wt%

**Figure S4.** HRTEM images (a) of the ZIF-8@BNNS corresponding SAED pattern (b)

**Figure S5.** SEM image and EDS mapping (Zn and B) of MMM loaded with 20 wt%

## Legend of Tables

**Table S1.** CO<sub>2</sub> permeability and CO<sub>2</sub>/N<sub>2</sub> selectivity of MMMs with different BNNS loadings and different pressures

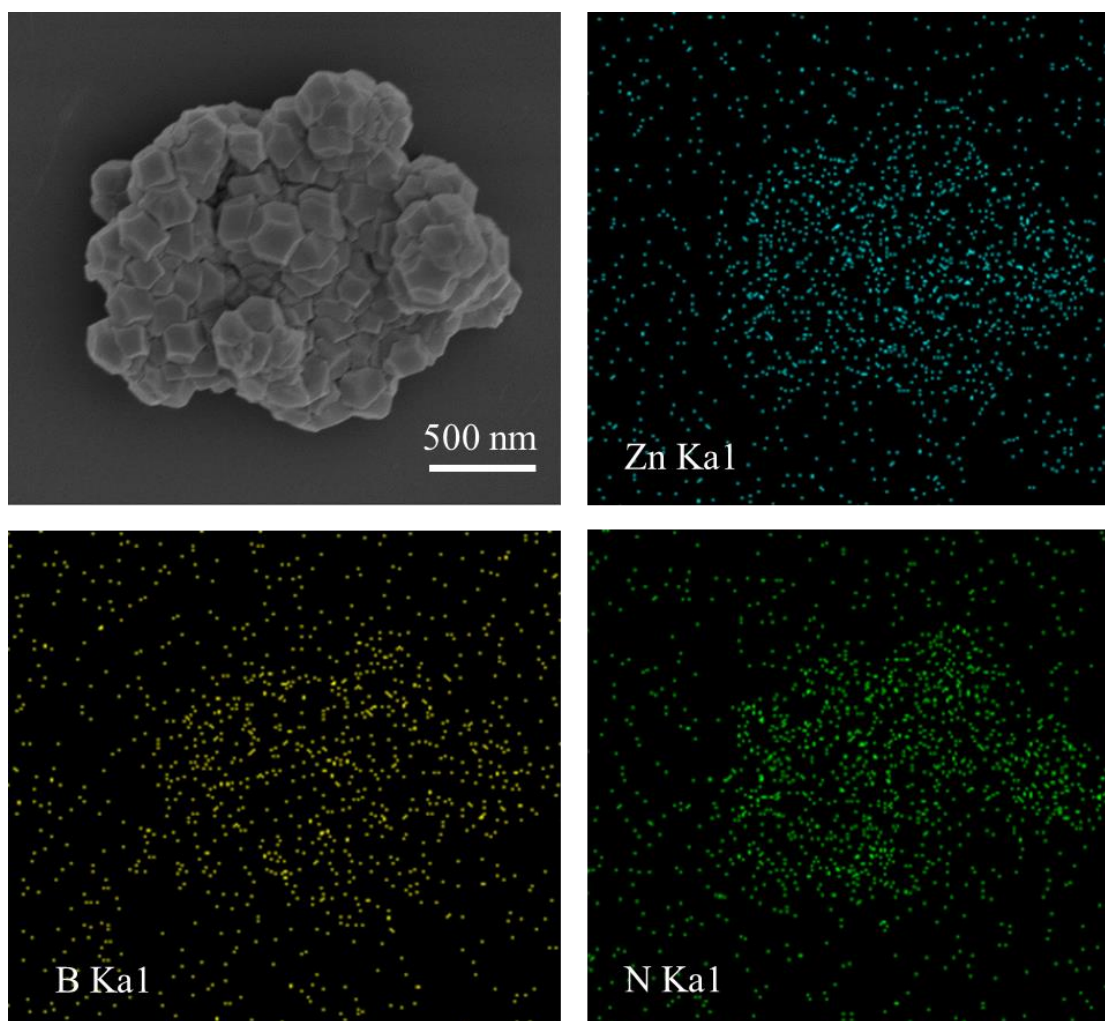

**Figure S1.** SEM image and EDS mapping (Zn, B and N) of ZIF-8@BNNS.

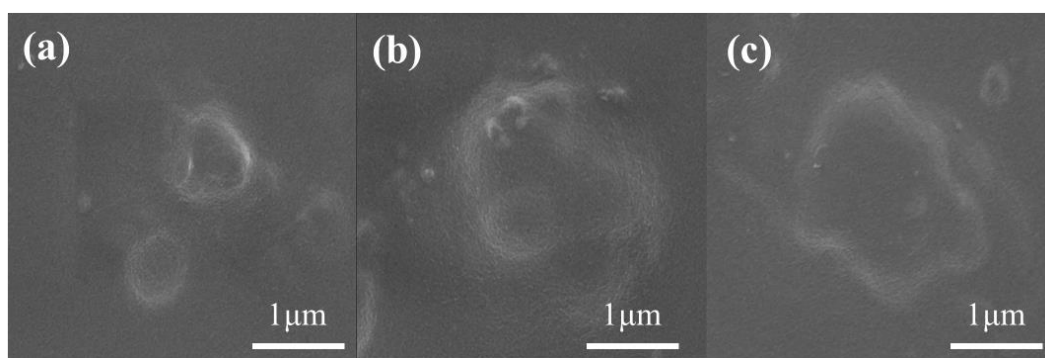

**Figure S2.** SEM surface image of the ZIF-8@BNNS/Pebax membrane loaded with (a) 5 wt% (b) 10 wt% (c) 15 wt%

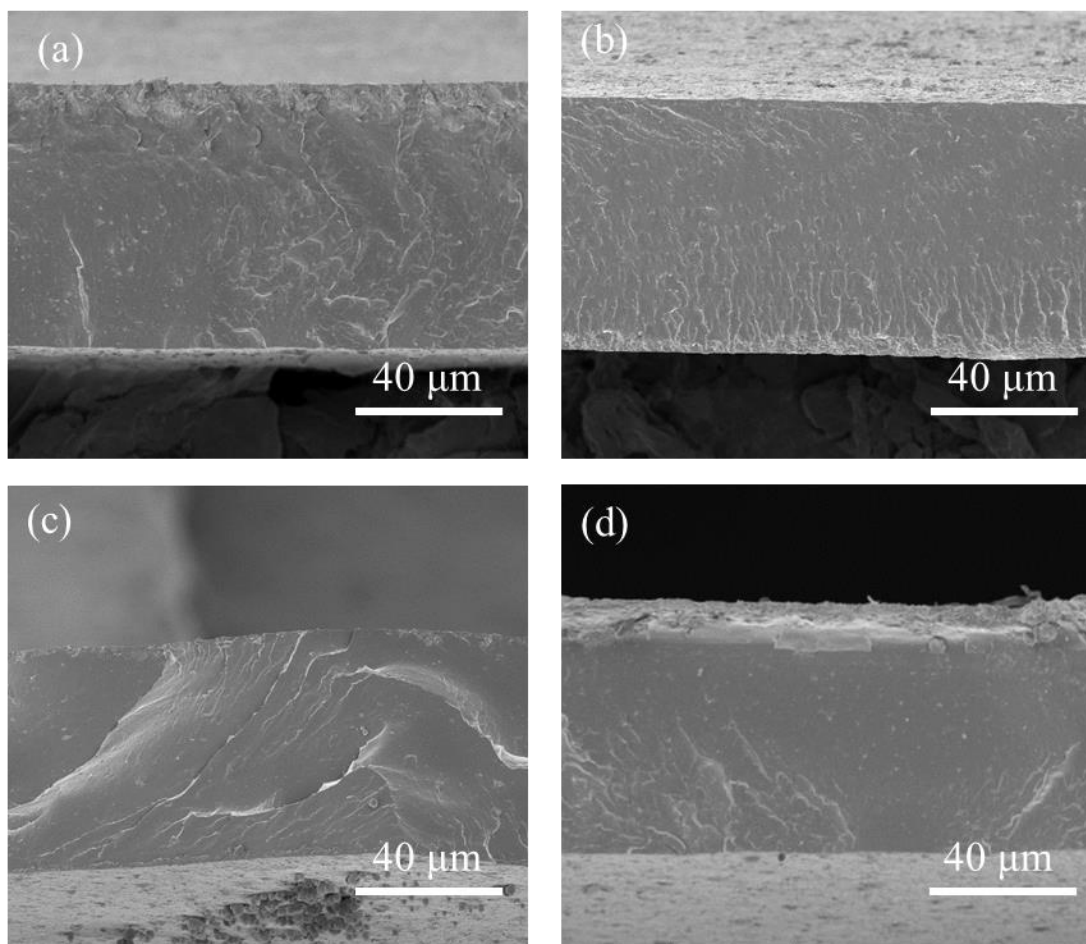

**Figure S3.** SEM cross-section image of the ZIF-8@BNNS/Pebax membrane loaded with (a) 5 wt% (b) 10 wt% (c) 15 wt% (d) 20 wt%

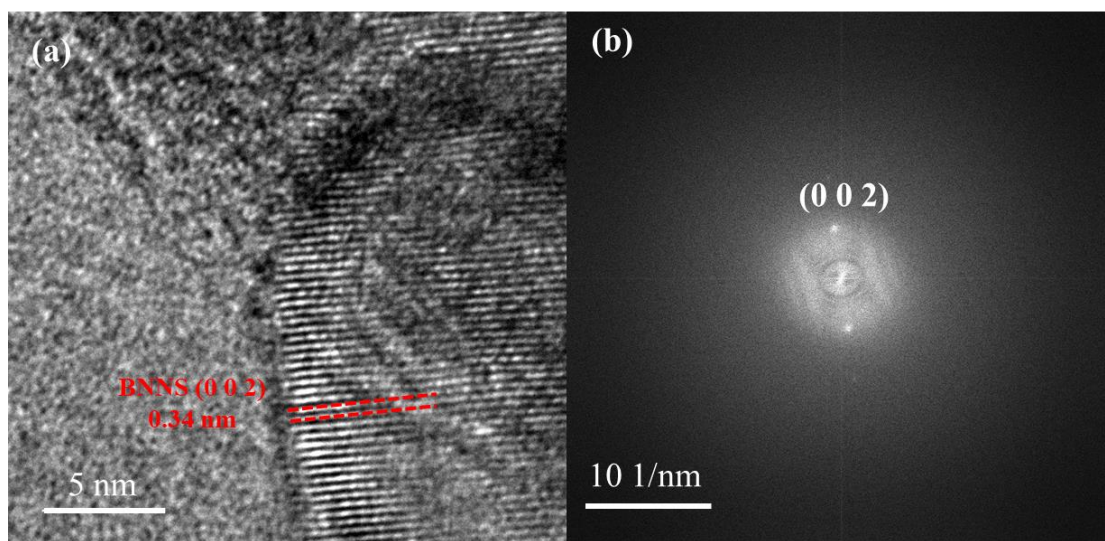

**Figure S4.** HRTEM images (a) of the ZIF-8@BNNS corresponding SAED pattern (b)

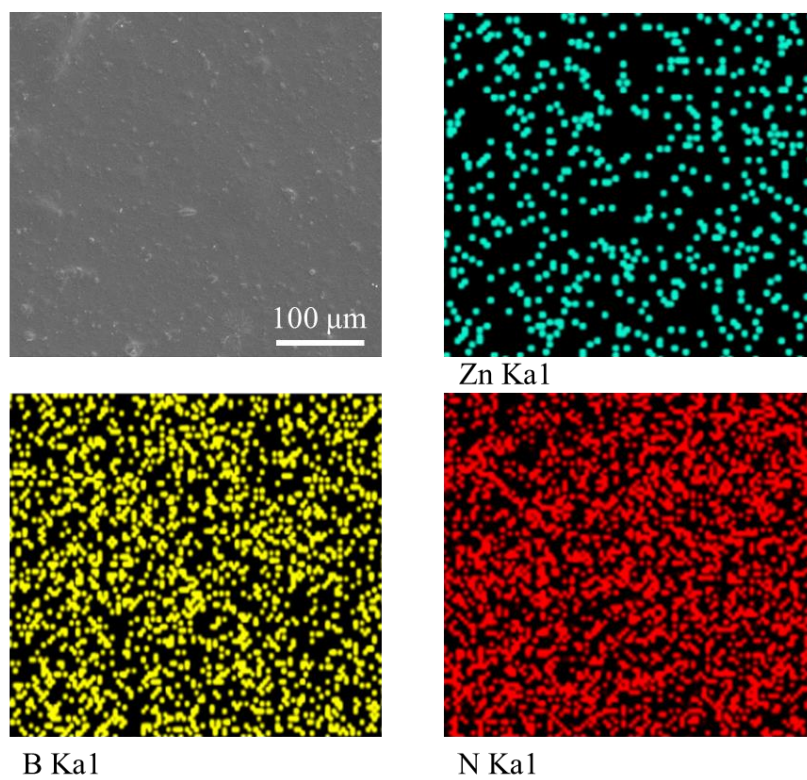

**Figure S5.** SEM image and EDS mapping (Zn and B) of MMM loaded with 20 wt%

**Table S1.** CO<sub>2</sub> permeability and CO<sub>2</sub>/N<sub>2</sub> selectivity of MMMs with different BNNS loadings and different pressures

| Loadings<br>(wt%) |                     | Pressure (bar) |       |       |
|-------------------|---------------------|----------------|-------|-------|
|                   |                     | 1              | 3     | 5     |
| 0                 | P <sub>CO2</sub>    | 78.73          | 80.97 | 81.97 |
|                   | S <sub>CO2/N2</sub> | 47.98          | 48.37 | 48.79 |
| 0.5               | P <sub>CO2</sub>    | 60.91          | 62.89 | 63.42 |
|                   | S <sub>CO2/N2</sub> | 54.38          | 55.91 | 56.21 |
| 1                 | P <sub>CO2</sub>    | 43.98          | 45.03 | 45.96 |
|                   | S <sub>CO2/N2</sub> | 62.86          | 63.56 | 64.01 |
| 2                 | P <sub>CO2</sub>    | 37.65          | 38.86 | 39.62 |
|                   | S <sub>CO2/N2</sub> | 56.96          | 57.62 | 58.17 |
